# Supplementary material for: A combined bottom-up and top-down strategy to fabricate lanthanide hydrate@2D MOF composite nanosheets for direct white light emission
Source: Royal Society of Chemistry journal article supplement (doi:10.1039/d1tc04239d), 2021-01-01
Supplement: d1tc04239d1.pdf [file d1tc04239d1.pdf]

## Supporting Information

### **A combined bottom-up and top-down strategy to fabricate lanthanide hydrate@2D MOF composite nanosheets for direct white light emission**

Jianping Tang,<sup>ab</sup> Zhenxin Liang,<sup>a</sup> Mengyi Huang,<sup>a</sup> Shaodong Su,<sup>a</sup> Yuehong Wen,<sup>\*ac</sup> Qi-Long Zhu<sup>ac</sup> and Xintao Wu<sup>ac</sup>

<sup>a</sup>State Key Laboratory of Structural Chemistry, Fujian Institute of Research on the Structure of Matter, Chinese Academy of Sciences, Fuzhou 350002, China

<sup>b</sup>College of Chemistry, Fuzhou University, Fuzhou, 350002, China

<sup>c</sup>University of Chinese Academy of Sciences, Beijing 100049, China

\*Corresponding Authors. E-mail: [yhwen@fjirsm.ac.cn](mailto:yhwen@fjirsm.ac.cn)

**Table S1.** Crystallographic data and refinement details for HSB-W5d.

|                                                                                                                                                      |                                                                  |
|------------------------------------------------------------------------------------------------------------------------------------------------------|------------------------------------------------------------------|
| Empirical formula                                                                                                                                    | C <sub>22</sub> H <sub>32</sub> N <sub>4</sub> O <sub>9</sub> Zn |
| <i>M</i>                                                                                                                                             | 561.88                                                           |
| Crystal system                                                                                                                                       | triclinic                                                        |
| Space group                                                                                                                                          | <i>P</i> -1                                                      |
| <i>a</i> (Å)                                                                                                                                         | 9.561(6)                                                         |
| <i>b</i> (Å)                                                                                                                                         | 11.067(7)                                                        |
| <i>c</i> (Å)                                                                                                                                         | 14.378(9)                                                        |
| $\alpha$ (°)                                                                                                                                         | 104.135(2)                                                       |
| $\beta$ (°)                                                                                                                                          | 95.491(9)                                                        |
| $\gamma$ (°)                                                                                                                                         | 115.421(8)                                                       |
| <i>V</i> /Å <sup>3</sup>                                                                                                                             | 1297.1(14)                                                       |
| <i>Z</i>                                                                                                                                             | 2                                                                |
| <i>D</i> <sub>c</sub> /g cm <sup>-3</sup>                                                                                                            | 1.439                                                            |
| $\mu$ /mm <sup>-1</sup>                                                                                                                              | 1.003                                                            |
| 2 $\theta$ <sub>range</sub> (°)                                                                                                                      | 4.734 to 54.996                                                  |
| <i>h, k, l, ranges</i>                                                                                                                               | -12 to 12,<br>-14 to 14,<br>-18 to 18                            |
| <i>F</i> (000)                                                                                                                                       | 588.0                                                            |
| <i>R</i> <sub>1</sub> , <sup>a</sup> <i>wR</i> <sub>2</sub> <sup>b</sup> [ <i>I</i> > 2 $\sigma$ ( <i>I</i> )]                                       | 0.0692, 0.1695                                                   |
| GOF on <i>F</i> <sup>2</sup>                                                                                                                         | 1.162                                                            |
| <sup>a</sup> <i>R</i> = $\Sigma( F_o  -  F_c )/\Sigma F_o $ . <sup>b</sup> <i>Rw</i> = $\{\Sigma w[(F_o^2 - F_c^2)^2]/\Sigma w[(F_o^2)^2]\}^{1/2}$ . |                                                                  |

**Table S2.** Selected bond lengths (Å) and angles (°) of HSB-W5d.

|                        |            |
|------------------------|------------|
| Zn1-N1                 | 2.233(3)   |
| Zn1-N2                 | 2.132(4)   |
| Zn1-N4 <sup>a</sup>    | 2.265(3)   |
| Zn1-O1                 | 1.998(3)   |
| Zn1-O3                 | 2.071(3)   |
| N1-Zn1-N4 <sup>a</sup> | 170.20(12) |
| N2-Zn1-N1              | 82.08(12)  |
| N2-Zn1-N4 <sup>a</sup> | 90.76(12)  |
| O1-Zn1-N1              | 98.37(12)  |
| O1-Zn1-N2              | 116.52(13) |
| O1-Zn1-N4 <sup>a</sup> | 90.81(11)  |
| O1-Zn1-O3              | 101.95(13) |
| O3-Zn1-N1              | 94.02(11)  |
| O3-Zn1-N2              | 141.51(14) |
| O3-Zn1-N4 <sup>a</sup> | 87.41(11)  |

Symmetry codes: a) -1+X, +Y, +Z.

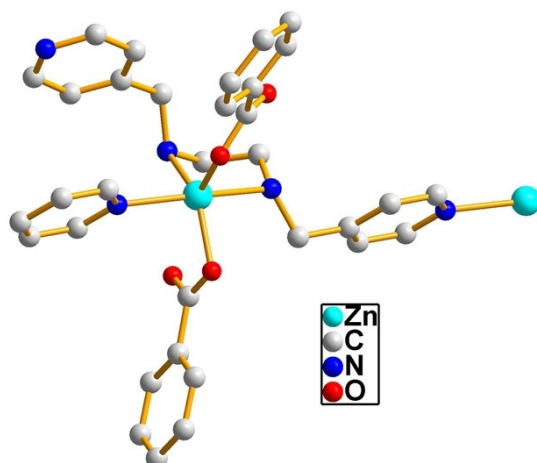

**Figure S1.** View of the coordination environment of Zn(II) ion in HSB-W5d (hydrogen atoms and free water molecules have been omitted for clarity).

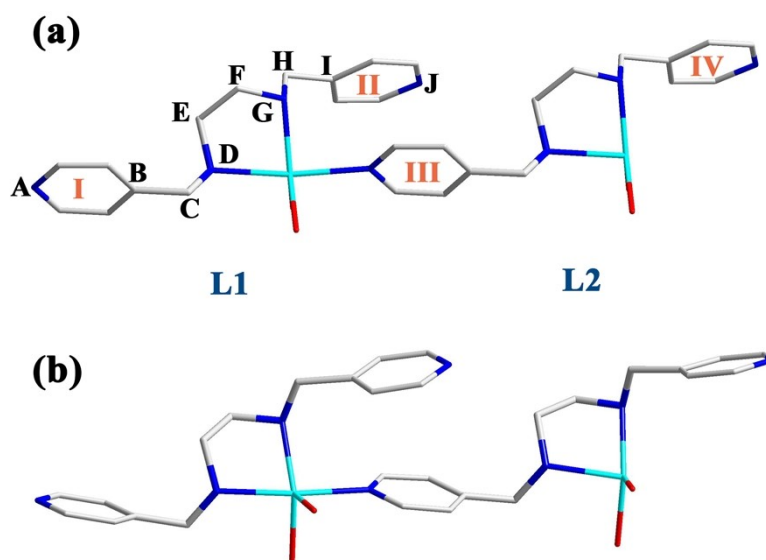

**HSB-W5d**

| Torsion Angles (°) | L1     | L2     |
|--------------------|--------|--------|
| A-C-H-J            | -146.5 | -146.5 |
| C-D-G-H            | -160.0 | -160.0 |
| B-C-D-E            | 60.1   | 60.1   |
| C-D-E-F            | 97.9   | 97.9   |
| D-E-F-G            | 57.7   | 57.7   |
| E-F-G-H            | 78.2   | 78.2   |
| F-G-H-I            | 174.0  | 174.0  |

| Dihedral Angle (°) |      |
|--------------------|------|
| I-II               | 16.0 |
| III-IV             | 16.0 |
| I-III              | 0    |
| II-IV              | 0    |

**HSB-W5e**

| Torsion Angles (°) | L1     | L2     |
|--------------------|--------|--------|
| A-C-H-J            | 162.7  | 131.8  |
| C-D-G-H            | 158.8  | 164.6  |
| B-C-D-E            | -39.7  | -67.2  |
| C-D-E-F            | -104.2 | -102.7 |
| D-E-F-G            | -57.4  | -56.0  |
| E-F-G-H            | -94.7  | -73.9  |
| F-G-H-I            | -169.9 | -172.2 |

| Dihedral Angle (°) |      |
|--------------------|------|
| I-II               | 24.0 |
| III-IV             | 22.2 |
| I-III              | 7.8  |
| II-IV              | 14.0 |

**Figure S2.** Comparison of the conformation of neighboring hsb-2 ligands in HSB-W5d (a) and HSB-W5e (b).

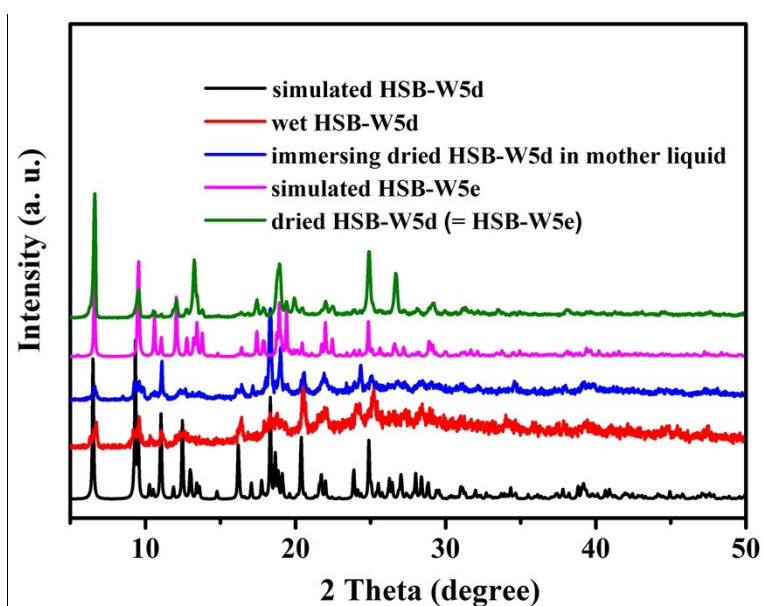

**Figure S3.** PXRD patterns of simulated HSB-W5d, wet crystal HSB-W5d, as-synthesized HSB-W5d (after drying), as-synthesized HSB-W5d immersing in the mother liquid, and simulated HSB-W5e.

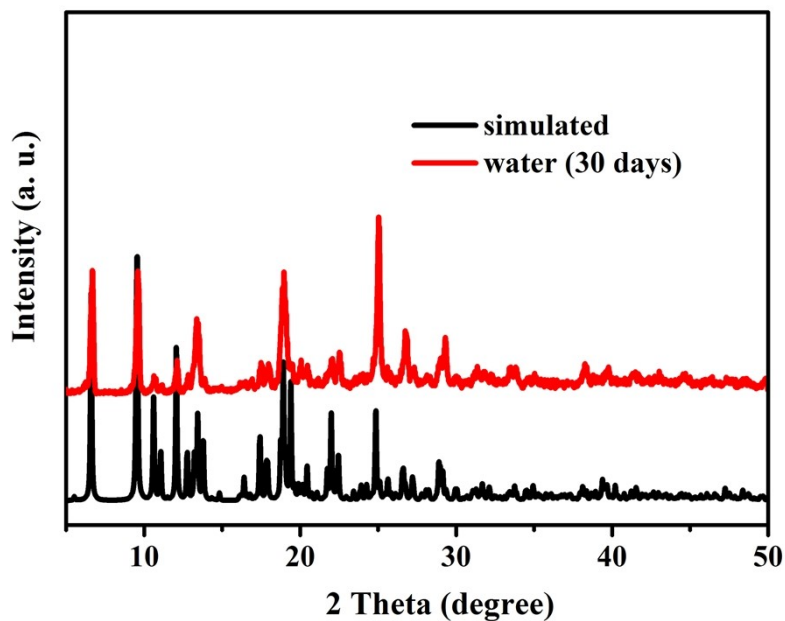

**Figure S4.** PXRD patterns of HSB-W5 after immersing in water for one month.

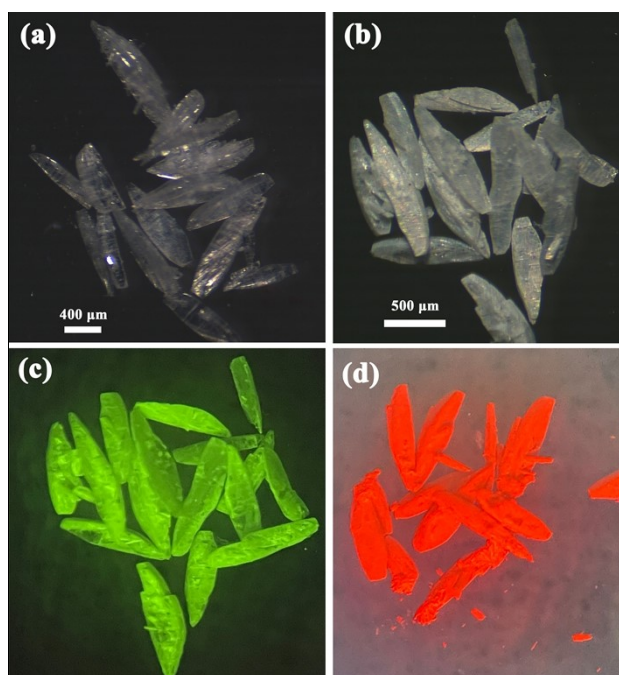

**Figure S5.** The photographs of as-synthesized HSB-W5 under sunlight (a), Tb(H<sub>2</sub>O)<sub>8</sub><sup>3+</sup>@HSB-W5 under sunlight (b), Tb(H<sub>2</sub>O)<sub>8</sub><sup>3+</sup>@HSB-W5 irradiated by a standard 254 nm laboratory UV lamp (c), and Eu(H<sub>2</sub>O)<sub>8</sub><sup>3+</sup>@HSB-W5 irradiated by a standard 254 nm laboratory UV lamp (d).

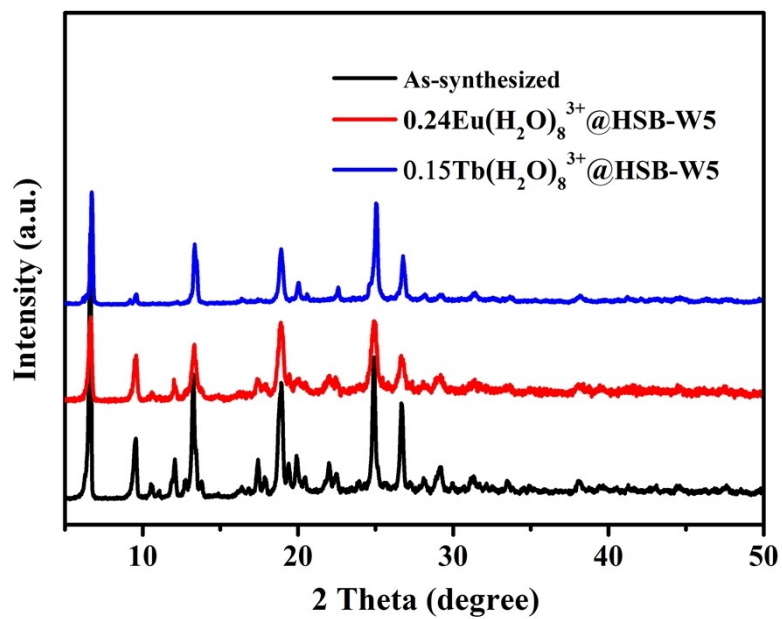

**Figure S6.** PXRD patterns of  $\text{Eu}(\text{H}_2\text{O})_8^{3+}@HSB\text{-W5}$  and  $\text{Tb}(\text{H}_2\text{O})_8^{3+}@HSB\text{-W5}$ .

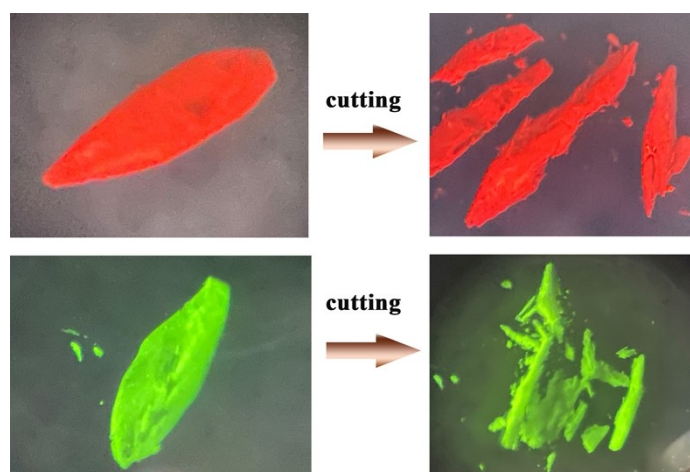

**Figure S7.** The photographs of crystals  $\text{Eu}(\text{H}_2\text{O})_8^{3+}@HSB\text{-W5}$  and  $\text{Tb}(\text{H}_2\text{O})_8^{3+}@HSB\text{-W5}$ , and their pieces irradiated by a standard 254 nm laboratory UV lamp.

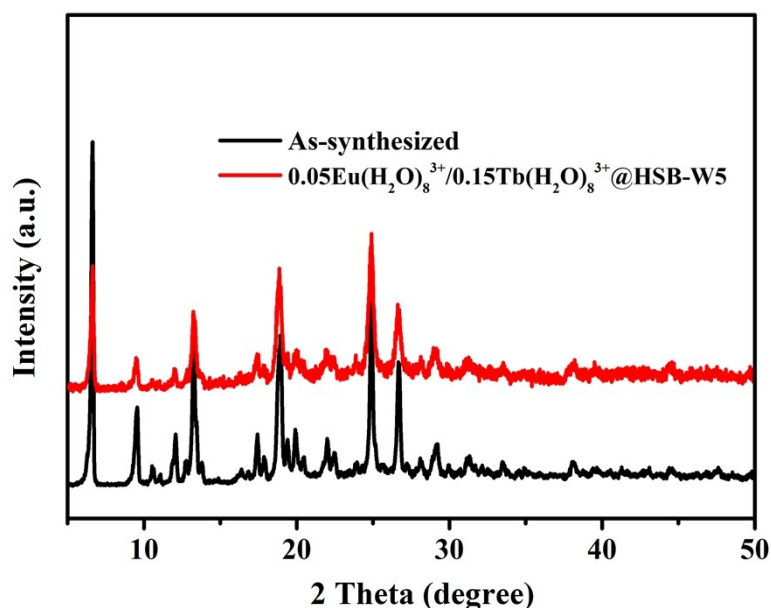

**Figure S8.** PXRD patterns of  $0.03\text{Eu}(\text{H}_2\text{O})_8^{3+}/0.15\text{Tb}(\text{H}_2\text{O})_8^{3+}@HSB-W5$  composite.

**Table S3.** The amounts of  $\text{Eu}^{3+}$  in  $\text{Eu}(\text{H}_2\text{O})_8^{3+}@HSB-W5$  composites based on ICP measurement.

| Composite name                                    | Initial concentration of $\text{Eu}^{3+}$ (mol L <sup>-1</sup> ) | Amount of $\text{Zn}^{2+}$ (%) | Amount of $\text{Eu}^{3+}$ (%) |
|---------------------------------------------------|------------------------------------------------------------------|--------------------------------|--------------------------------|
| $x\text{Eu}(\text{H}_2\text{O})_8^{3+}@HSB-W5$    |                                                                  |                                |                                |
| $0.08\text{Eu}(\text{H}_2\text{O})_8^{3+}@HSB-W5$ | 0.009                                                            | 9.55                           | 1.70                           |
| $0.13\text{Eu}(\text{H}_2\text{O})_8^{3+}@HSB-W5$ | 0.018                                                            | 9.76                           | 2.91                           |
| $0.24\text{Eu}(\text{H}_2\text{O})_8^{3+}@HSB-W5$ | 0.027                                                            | 9.41                           | 5.21                           |

**Table S4.** The amounts of  $\text{Tb}^{3+}$  in  $\text{Tb}(\text{H}_2\text{O})_8^{3+}@HSB-W5$  composites based on ICP measurement.

| Composite name                                    | Initial concentration of $\text{Tb}^{3+}$ (mol L <sup>-1</sup> ) | Amount of $\text{Zn}^{2+}$ (%) | Amount of $\text{Tb}^{3+}$ (%) |
|---------------------------------------------------|------------------------------------------------------------------|--------------------------------|--------------------------------|
| $x\text{Tb}(\text{H}_2\text{O})_8^{3+}@HSB-W5$    |                                                                  |                                |                                |
| $0.04\text{Tb}(\text{H}_2\text{O})_8^{3+}@HSB-W5$ | 0.002                                                            | 9.97                           | 1.04                           |
| $0.08\text{Tb}(\text{H}_2\text{O})_8^{3+}@HSB-W5$ | 0.007                                                            | 9.80                           | 1.87                           |
| $0.15\text{Tb}(\text{H}_2\text{O})_8^{3+}@HSB-W5$ | 0.014                                                            | 9.71                           | 3.48                           |

**Table S5.** The amounts of  $\text{Eu}^{3+}$  and  $\text{Tb}^{3+}$  in WLE  $\text{Eu}(\text{H}_2\text{O})_8^{3+}/\text{Tb}(\text{H}_2\text{O})_8^{3+}@HSB-W5$  composites based on ICP measurement.

| Composite name                                                                             | Amount of $\text{Zn}^{2+}$ (%) | Amount of $\text{Eu}^{3+}$ (%) | Amount of $\text{Tb}^{3+}$ (%) |
|--------------------------------------------------------------------------------------------|--------------------------------|--------------------------------|--------------------------------|
| $x\text{Eu}(\text{H}_2\text{O})_8^{3+}/y\text{Tb}(\text{H}_2\text{O})_8^{3+}@HSB-W5$       |                                |                                |                                |
| $0.03\text{Eu}(\text{H}_2\text{O})_8^{3+}/0.15\text{Tb}(\text{H}_2\text{O})_8^{3+}@HSB-W5$ | 9.22                           | 0.72                           | 3.41                           |

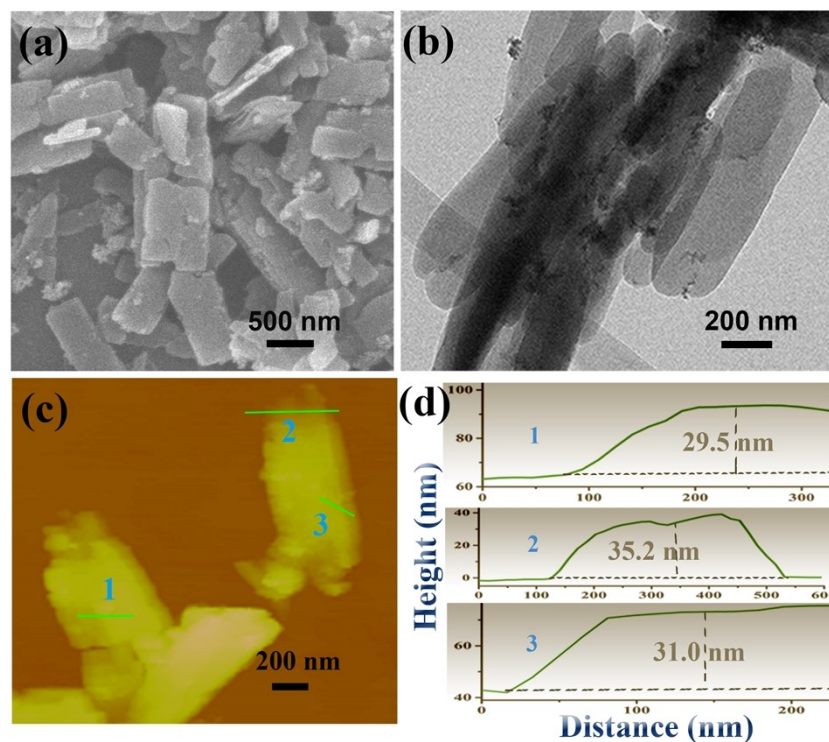

**Figure S9.** (a) SEM and (b) TEM images of the HSB-W5-NS nanosheets. (c, d) AFM images of the HSB-W5-NS nanosheets and the corresponding height profiles.

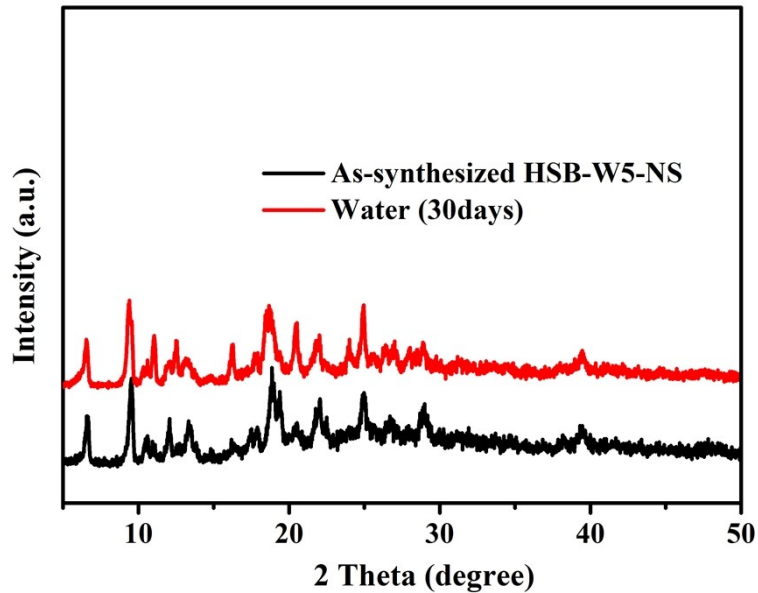

**Figure S10.** PXRD patterns of HSB-W5-NS after immersing in water for one month.



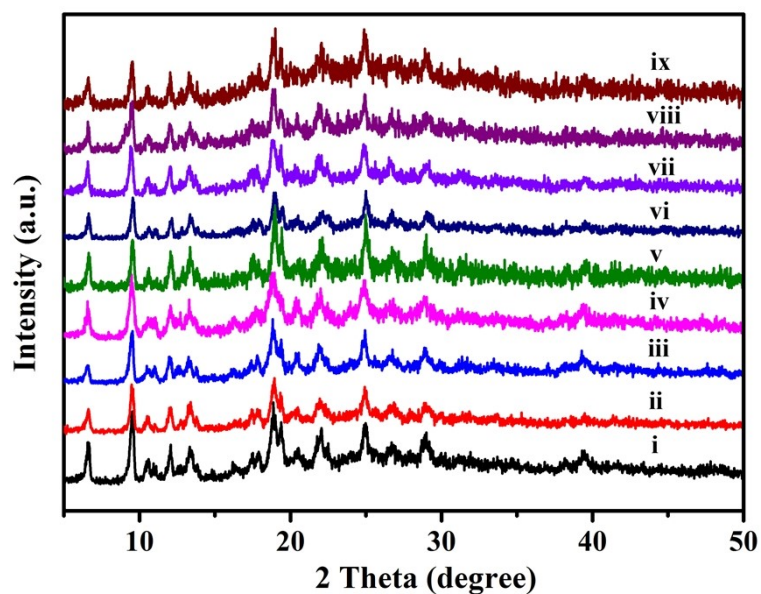

**Figure S11.** PXRD patterns of as-synthesized HSB-W5-NS (i),  $x\text{Eu}(\text{H}_2\text{O})_8^{3+}@$ HSB-W5-NS (ii-v:  $x = 0.26-1.60$ ), and  $x\text{Tb}(\text{H}_2\text{O})_8^{3+}@$ HSB-W5-NS (vi-ix:  $x = 0.08-0.48$ ).

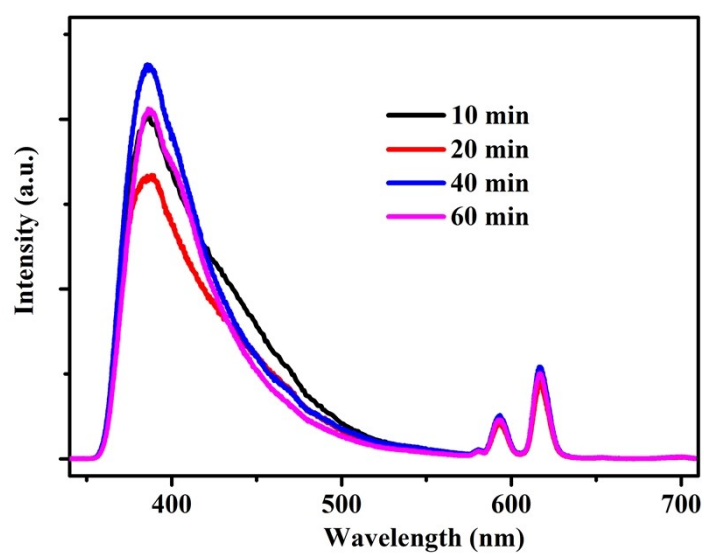

**Figure S12.** Emission changes with the reaction time.

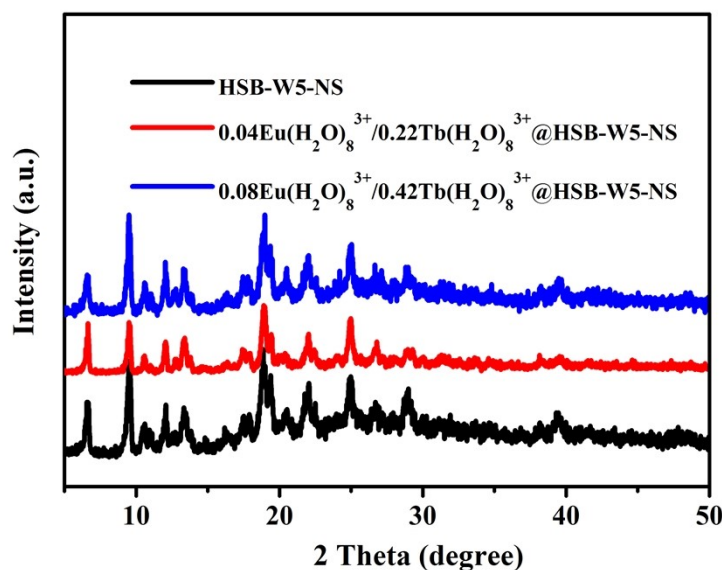

**Figure S13.** PXRD patterns of  $\text{Eu}(\text{H}_2\text{O})_8^{3+}/\text{Tb}(\text{H}_2\text{O})_8^{3+}@$ HSB-W5-NS composite.

**Table S6.** The amounts of  $\text{Eu}^{3+}$  in  $\text{Eu}(\text{H}_2\text{O})_8^{3+}@$ HSB-W5-NS composites based on ICP measurement.

| Composite name                                         | Initial concentration of $\text{Eu}^{3+}$ (mol L <sup>-1</sup> ) | Amount of $\text{Zn}^{2+}$ (%) | Amount of $\text{Eu}^{3+}$ (%) |
|--------------------------------------------------------|------------------------------------------------------------------|--------------------------------|--------------------------------|
| $x\text{Eu}(\text{H}_2\text{O})_8^{3+}@$ HSB-W5-NS     |                                                                  |                                |                                |
| 0.26 $\text{Eu}(\text{H}_2\text{O})_8^{3+}@$ HSB-W5-NS | 0.001                                                            | 9.52                           | 5.80                           |
| 0.55 $\text{Eu}(\text{H}_2\text{O})_8^{3+}@$ HSB-W5-NS | 0.002                                                            | 8.45                           | 10.78                          |
| 1.24 $\text{Eu}(\text{H}_2\text{O})_8^{3+}@$ HSB-W5-NS | 0.003                                                            | 6.15                           | 17.76                          |
| 1.60 $\text{Eu}(\text{H}_2\text{O})_8^{3+}@$ HSB-W5-NS | 0.004                                                            | 5.68                           | 21.15                          |

**Table S7.** The amounts of  $\text{Tb}^{3+}$  in  $\text{Tb}(\text{H}_2\text{O})_8^{3+}@$ HSB-W5-NS composites based on ICP measurement.

| Composite name                                         | Initial concentration of $\text{Tb}^{3+}$ (mol L <sup>-1</sup> ) | Amount of $\text{Zn}^{2+}$ (%) | Amount of $\text{Tb}^{3+}$ (%) |
|--------------------------------------------------------|------------------------------------------------------------------|--------------------------------|--------------------------------|
| $x\text{Tb}(\text{H}_2\text{O})_8^{3+}@$ HSB-W5-NS     |                                                                  |                                |                                |
| 0.08 $\text{Tb}(\text{H}_2\text{O})_8^{3+}@$ HSB-W5-NS | 0.00055                                                          | 12.80                          | 2.51                           |
| 0.13 $\text{Tb}(\text{H}_2\text{O})_8^{3+}@$ HSB-W5-NS | 0.001                                                            | 12.23                          | 4.02                           |
| 0.21 $\text{Tb}(\text{H}_2\text{O})_8^{3+}@$ HSB-W5-NS | 0.0013                                                           | 11.47                          | 5.90                           |
| 0.48 $\text{Tb}(\text{H}_2\text{O})_8^{3+}@$ HSB-W5-NS | 0.0022                                                           | 9.60                           | 11.24                          |

**Table S8.** The amounts of  $\text{Eu}^{3+}$  and  $\text{Tb}^{3+}$  in WLE  $\text{Eu}(\text{H}_2\text{O})_8^{3+}/\text{Tb}(\text{H}_2\text{O})_8^{3+}@$ HSB-W5-NS composites based on ICP measurement.

| Composite name                                                                                  | Amount of $\text{Zn}^{2+}$ (%) | Amount of $\text{Eu}^{3+}$ (%) | Amount of $\text{Tb}^{3+}$ (%) |
|-------------------------------------------------------------------------------------------------|--------------------------------|--------------------------------|--------------------------------|
| $x\text{Eu}(\text{H}_2\text{O})_8^{3+}/y\text{Tb}(\text{H}_2\text{O})_8^{3+}@$ HSB-W5-NS        |                                |                                |                                |
| 0.04 $\text{Eu}(\text{H}_2\text{O})_8^{3+}/0.22\text{Tb}(\text{H}_2\text{O})_8^{3+}@$ HSB-W5-NS | 11.13                          | 1.04                           | 6.03                           |
| 0.08 $\text{Eu}(\text{H}_2\text{O})_8^{3+}/0.42\text{Tb}(\text{H}_2\text{O})_8^{3+}@$ HSB-W5-NS | 9.52                           | 1.76                           | 9.75                           |

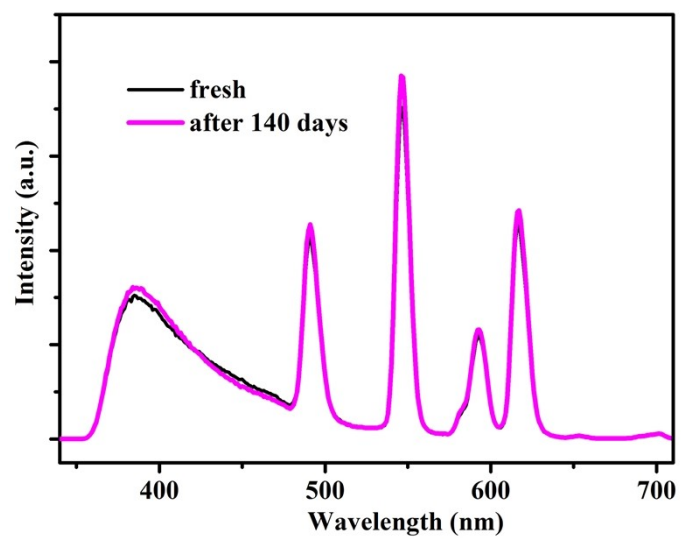

**Figure S14.** Comparison of the emission spectra of  $0.04\text{Eu}(\text{H}_2\text{O})_8^{3+}/0.22\text{Tb}(\text{H}_2\text{O})_8^{3+}@\text{HSB-W5-NS}$  (fresh vs. after 140 days).

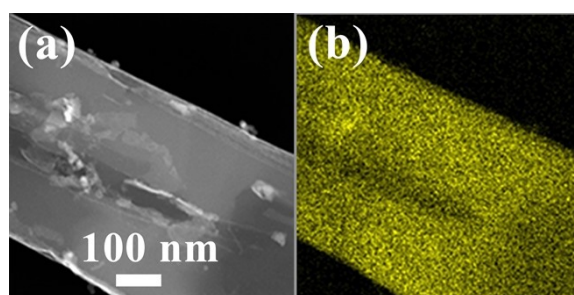

**Figure S15.** TEM image of  $0.04\text{Eu}(\text{H}_2\text{O})_8^{3+}/0.22\text{Tb}(\text{H}_2\text{O})_8^{3+}@\text{HSB-W5-NS}$  (a) and corresponding EDX mapping image for C element (b).
